# Supplementary material for: Two new cobalt–zinc orthophosphate monohydrates: hydrothermal synthesis, crystal structures and thermal investigation
Source: Royal Society of Chemistry journal article supplement (doi:10.1039/b412473a), 2005-01-01
Supplement: b412473a.doc [file b412473a.doc]

**S1**. Powder XRD profiles for **1** and **2**

**S2.** Calculated oxidation states, *V*i, for atoms in the structure of Co2.59Zn0.41(PO4)2H2O **1**, using ref. 26. The contribution from H is not included in the calculations.

|  | ***V*i** | **Coord. number** |
| --- | --- | --- |
| Co(1) | 1.91 | 6 |
| Co(2) | 1.94 | 6 |
| Co(3) | 1.97 | 5 |
| Zn(3) | 2.03 | 5 |
| P(1) | 4.92 | 4 |
| P(2) | 4.90 | 4 |
| O(1) | 1.93 | 3 |
| O(2) | 2.00 | 3 |
| O(3) | 1.75 | 2 |
| O(4) | 1.77 | 3 |
| O(5) | 2.02 | 3 |
| O(6) | 1.90 | 3 |
| O(7) | 1.86 | 3 |
| O(8) | 1.88 | 3 |
| O(9) | 0.55 | 2 |

**S3.** Calculated oxidation states, *V*i, for atoms in the structure of Co0.72Zn2.28(PO4)2H2O **2**, using ref. 26. The contribution from H is not included in the calculations.

|  | ***V*i** | **Coord. number** |
| --- | --- | --- |
| Zn(1) | 1.99 | 4 |
| Zn(2) | 2.03 | 4 |
| Zn(3) | 2.06 | 6 |
| Co(1) | 1.92 | 4 |
| Co(2) | 1.96 | 4 |
| Co(3) | 1.97 | 6 |
| P(1) | 4.95 | 4 |
| P(2) | 4.92 | 4 |
| O(1) | 1.77 | 2 |
| O(2) | 1.95 | 3 |
| O(3) | 1.96 | 3 |
| O(4) | 2.03 | 3 |
| O(5) | 1.78 | 2 |
| O(6) | 2.07 | 3 |
| O(7) | 1.76 | 2 |
| O(8)  O(9) | 1.94  0.36 | 3  1 |

**S4**

**Fig. 1** Phase fractions of the materials in the solid products from Series **A** (amine present) as a function of the relative amount of Co, *n*, in the reaction mixtures: [CH3NH3][(Co*x*Zn1-*x*)4(PO4)3], blue square; hopeite, (Co*x*Zn1-*x*)3(PO4)24H2O, green star; Co2.59Zn0.41(PO4)2H2O **1**, red triangle; amorphous powder, orange diamond; Co3(HPO4)2(OH)2, black circle. The lines are sketched as a guide to the eye.

**Fig. 2** Phase fractions of the materials in the solid products from Series **B** (amine absent) as a function of the relative amount of Co, *n*, in the reaction mixtures: Co0.72Zn2.28(PO4)2H2O **2**, blue diamonds and Co7(HPO4)4(PO4)2, red circles. The lines are sketched as a guide to the eye.
